# Supplementary material for: Dysregulation of CD4+ and CD8+ resident memory T, myeloid, and stromal cells in steroid-experienced, checkpoint inhibitor colitis
Source: PubMed Central journal article supplement — J Immunother Cancer. 2024 Apr 19;12(4):e008628. doi: 10.1136/jitc-2023-008628 (PMC11033653; doi:10.1136/jitc-2023-008628), 2024-04-19
Supplement: jitc-2023-008628supp007.pdf [file jitc-2023-008628supp007.pdf]

**Figure S7. Statistical testing of TCR data from CPI colitis and controls.**

**A.** Comparisons of the number of expanded clusters (node size >1), normalized to the total number of cells per sample, across disease states in biopsies (top) and blood (bottom).

| Biopsies                              | level | Overall                    | cpi_colitis                 | hc                         | uc                         | Overall<br>l p | colitis<br>vs uc | colitis<br>vs hc | hc vs.<br>uc |
|---------------------------------------|-------|----------------------------|-----------------------------|----------------------------|----------------------------|----------------|------------------|------------------|--------------|
| n                                     |       | 14                         | 9                           | 3                          | 2                          |                |                  |                  |              |
| ncluster (median<br>[IQR])            |       | 55.00<br>[33.25,<br>99.75] | 87.00<br>[62.00,<br>106.00] | 27.00<br>[25.00,<br>28.50] | 34.00<br>[29.50,<br>38.50] | 0.011          | 0.033            | 0.012            | 0.564        |
| normalized.ncluster<br>(median [IQR]) |       | 0.08 [0.06,<br>0.09]       | 0.09 [0.08,<br>0.11]        | 0.05 [0.04,<br>0.05]       | 0.06 [0.06,<br>0.06]       | 0.009          | 0.034            | 0.013            | 0.083        |

| Blood                                 | level | Overall                   | cpi_colitis               | hc                        | uc                         | Overall<br>l p            | colitis<br>vs uc | colitis<br>vs hc | hc vs.<br>uc |
|---------------------------------------|-------|---------------------------|---------------------------|---------------------------|----------------------------|---------------------------|------------------|------------------|--------------|
| N                                     |       | 14                        | 8                         | 3                         | 3                          |                           |                  |                  |              |
| ncluster (median<br>[IQR])            |       | 13.00<br>[4.00,<br>22.50] | 13.00<br>[5.75,<br>18.75] | 10.00<br>[6.50,<br>26.00] | 27.00<br>[15.00,<br>36.50] | 13.00<br>[4.00,<br>22.50] | 0.22             | 0.838            | 0.658        |
| normalized.ncluster<br>(median [IQR]) |       | 0.02<br>[0.01,<br>0.03]   | 0.03<br>[0.01,<br>0.03]   | 0.02 [0.01,<br>0.03]      | 0.02 [0.01,<br>0.03]       | 0.02<br>[0.01,<br>0.03]   | 0.838            | 0.683            | 0.827        |

**B.** Gini coefficient for all T cells per sample in blood and biopsies across disease states.

|                                                | level | Overall              | cpi_colitis          | hc                   | uc                   | Overall<br>p | colitis<br>vs uc | colitis<br>vs hc | hc vs.<br>uc |
|------------------------------------------------|-------|----------------------|----------------------|----------------------|----------------------|--------------|------------------|------------------|--------------|
| N                                              |       | 14                   | 8                    | 3                    | 3                    |              |                  |                  |              |
| Gini coefficient in<br>blood (median<br>[IQR]) |       | 0.03 [0.01,<br>0.09] | 0.03 [0.02,<br>0.05] | 0.01 [0.01,<br>0.05] | 0.12 [0.06,<br>0.12] | 0.544        | 0.683            | 0.414            | 0.544        |

| N                                           |  | 14                | 9                 | 3                 | 2                 |       |       |       |       |
|---------------------------------------------|--|-------------------|-------------------|-------------------|-------------------|-------|-------|-------|-------|
| Gini coefficient in biopsies (median [IQR]) |  | 0.17 [0.12, 0.24] | 0.18 [0.17, 0.34] | 0.07 [0.07, 0.08] | 0.14 [0.13, 0.14] | 0.016 | 0.099 | 0.013 | 0.016 |

**C.** Descriptive statistics of the number of individual expanded TCR $\alpha\beta$  clusters shared by combinations of CD4T RM, CD8T RM, and CD8T GZMB cells in blood and biopsies.

|                                                     | Both blood and biopsies | Blood | Biopsies    |
|-----------------------------------------------------|-------------------------|-------|-------------|
| # of Expanded clusters (cluster size >1)            | 1248                    | 230   | 1035        |
| # of clusters shared by CD4T RM, CD8T GZMB, CD8T RM | 66                      | 0     | 66 (6.4%)   |
| # of Shared between CD4T RM, CD8T GZMB              | 81                      | 0     | 81 (7.8%)   |
| # of Shared between CD4T RM, CD8T RM                | 155                     | 0     | 155 (15.0%) |
| # of Shared between CD8T GZMB, CD8T RM              | 203                     | 0     | 202 (19.5%) |

**D.** Descriptive statistics of the number of individual expanded clusters shared by combinations of CD4T RM, CD8T RM, and CD8T GZMB cells in biopsies across disease states.

| Biopsies                                            | cpi_colitis | uc       | hc       |
|-----------------------------------------------------|-------------|----------|----------|
| # of Expanded clusters (cluster size >1)            | 887         | 68       | 80       |
| # of clusters shared by CD4T RM, CD8T GZMB, CD8T RM | 64 (7.2%)   | 2 (2.9%) | 0        |
| # of Shared between CD4T                            | 78 (8.8%)   | 2 (2.9%) | 1 (1.3%) |

|                                         |             |           |          |
|-----------------------------------------|-------------|-----------|----------|
| RM, CD8T GZMB                           |             |           |          |
| # of Shared between CD4T<br>RM, CD8T RM | 146 (16.4%) | 7 (10.3%) | 2 (2.5%) |
