# Supplementary material for: Dysregulation of CD4+ and CD8+ resident memory T, myeloid, and stromal cells in steroid-experienced, checkpoint inhibitor colitis
Source: PubMed Central journal article supplement — J Immunother Cancer. 2024 Apr 19;12(4):e008628. doi: 10.1136/jitc-2023-008628 (PMC11033653; doi:10.1136/jitc-2023-008628), 2024-04-19
Supplement: jitc-2023-008628supp010.pdf [file jitc-2023-008628supp010.pdf]

**Table S1.** Baseline demographic and clinical data for study participants. Biopsies obtained from the distal colon. Blood collection was within 2 days of biopsy collection, with the exception of HS12, where blood was collected 2 weeks after biopsy collection. CPI-checkpoint inhibitor; Combo-combination anti-CTLA-4 and anti-PD-1; SCLC-small cell lung cancer; TNF-tumor necrosis factor.

| ID  | Disease     | Age   | Sex | CPI       | CPI response        | Cancer   | Prior immunosuppression | CPI colitis onset (weeks) | Grade colitis | Endoscopic severity | Histologic features                                                                                         | CPI colitis responded to:   |
|-----|-------------|-------|-----|-----------|---------------------|----------|-------------------------|---------------------------|---------------|---------------------|-------------------------------------------------------------------------------------------------------------|-----------------------------|
| HS1 | HC          | 50-55 | M   | N/A       | N/A                 | N/A      | N/A                     | N/A                       | N/A           | 0                   | N/A                                                                                                         | N/A                         |
| HS2 | HC          | 60-65 | M   | N/A       | N/A                 | N/A      | N/A                     | N/A                       | N/A           | 0                   | N/A                                                                                                         | N/A                         |
| HS3 | HC          | 50-55 | F   | N/A       | N/A                 | N/A      | N/A                     | N/A                       | N/A           | 0                   | N/A                                                                                                         | N/A                         |
| HS4 | UC          | 30-35 | F   | N/A       | N/A                 | N/A      | anti-TNF                | N/A                       | N/A           | 0                   | No significant pathologic abnormality                                                                       | N/A                         |
| HS5 | UC          | 25-30 | F   | N/A       | N/A                 | N/A      | anti-TNF                | N/A                       | N/A           | 0                   | cryptitis and crypt abscess formation, consistent with active colitis                                       | N/A                         |
| HS6 | UC          | 50-55 | M   | N/A       | N/A                 | N/A      | anti-TNF                | N/A                       | N/A           | 2                   | cryptitis, crypt abscess formation, ulceration, mild crypt architectural distortion, Paneth cell metaplasia | N/A                         |
| HS7 | CPI Colitis | 70-75 | M   | anti-PD-1 | nonresponse         | Prostate | None                    | 48                        | Grade 1       | 1                   | lymphocytic colitis, stromal neutrophils, cryptitis                                                         | Budesonide                  |
| HS8 | CPI Colitis | 80-85 | M   | anti-PD-1 | response            | HNSCC    | Corticosteroid          | 55                        | Grade 1       | 1                   | active proctitis and colitis                                                                                | Increased corticosteroid    |
| HS9 | CPI Colitis | 55-60 | F   | anti-PD-1 | response (adjuvant) | Melanoma | Corticosteroid          | 16                        | Grade 2       | 2                   | active colitis, prominent cryptitis and                                                                     | anti-TNF and corticosteroid |

|      |             |       |   |           |                     |                       |                                                         |    |           |   |                                                                                                           |                                 |
|------|-------------|-------|---|-----------|---------------------|-----------------------|---------------------------------------------------------|----|-----------|---|-----------------------------------------------------------------------------------------------------------|---------------------------------|
|      |             |       |   |           |                     |                       |                                                         |    |           |   | crypt abscesses                                                                                           |                                 |
| HS10 | CPI Colitis | 70-75 | F | anti-PD-1 | response            | Merkel cell carcinoma | Corticosteroid, anti-TNF (8 doses), anti-a4B7 (9 doses) | 2  | Grade 2   | 1 | cryptitis and crypt abscess formation, prominent epithelial apoptosis and crypt atrophy                   | 2nd anti-TNF and corticosteroid |
| HS11 | CPI Colitis | 55-60 | M | anti-PD-1 | response            | Melanoma              | Corticosteroid, anti-TNF (3 doses)                      | 44 | Grade 2/3 | 1 | cryptitis, crypt abscess formation, Paneth cell metaplasia, consistent with chronic active colitis        | anti-a4B7                       |
| HS12 | CPI Colitis | 50-55 | F | anti-PD-1 | response (adjuvant) | Melanoma              | Corticosteroid, anti-TNF (1 dose)                       | 11 | Grade 2   | 0 | cryptitis with focal acute inflammation in the lamina propria and increased intraepithelial lymphocytosis | anti-a4B7                       |
| HS13 | CPI Colitis | 70-75 | F | Combo     | nonresponse         | SCLC Lung             | Corticosteroid                                          | 6  | Grade 3   | 0 | cryptitis and crypt abscess formation, consistent with active colitis                                     | Increased corticosteroid        |
| HS14 | CPI Colitis | 60-65 | M | Combo     | nonresponse         | Renal cell carcinoma  | Corticosteroid                                          | 6  | Grade 3   | 3 | cryptitis, crypt abscesses, crypt loss/atrophy                                                            | anti-TNF and corticosteroid     |
| HS15 | CPI Colitis | 65-70 | M | Combo     | nonresponse         | Renal cell carcinoma  | Corticosteroid                                          | 4  | Grade 3   | 1 | cryptitis with crypt abscesses, focal crypt atrophy                                                       | anti-TNF and corticosteroid     |

**Table S2. Antibody panels for CITEseq (TotalSeq-C, top), and mass cytometry (CyTOF, bottom).**

| Assay   | Target (anti-human unless specified) | Ion channel/DNA barcode | Metal/DNA ID | Clone             | H5AD symbol           | Vendor    |
|---------|--------------------------------------|-------------------------|--------------|-------------------|-----------------------|-----------|
| CITEseq | B7-H4                                | TGTATGTCTGCCTTG         | C0395        | MIH43             | B7-H4                 | BioLegend |
|         | CD10                                 | CAGCCATTCATTAGG         | C0062        | HI10a             | CD10                  | BioLegend |
|         | CD101 (BB27)                         | CTACTTCCCTGTCAA         | C0944        | BB27              | CD101--BB27           | BioLegend |
|         | CD103 (Integrin alpha E)             | GACCTCATTGTGAAT         | C0145        | Ber-ACT8          | CD103                 | BioLegend |
|         | CD105                                | ATCGTCGAGAGCTAG         | C0068        | 43A3              | CD105--ENG            | BioLegend |
|         | CD106                                | TCACAGTTCCTTGGA         | C0245        | STA               | CD106                 | BioLegend |
|         | CD107a (LAMP-1)                      | CAGCCCACTGCAATA         | C0155        | H4A3              | CD107a--LAMP-1        | BioLegend |
|         | CD112 (Nectin-2)                     | AACCTTCCGTCTAAG         | C0024        | TX31              | CD112--Nectin-2       | BioLegend |
|         | CD117 (c-kit)                        | AGACTAATAGCTGAC         | C0061        | 104D2             | CD117--c-kit          | BioLegend |
|         | CD119 (IFN-gamma R alpha chain)      | TGTGTATTCCTTGT          | C0219        | GIR-208           | CD119--IFNGR1         | BioLegend |
|         | CD11a                                | TATATCCTTGTGAGC         | C0185        | TS2/4             | CD11a                 | BioLegend |
|         | CD11b                                | GACAAGTGATCTGCA         | C0161        | ICRF44            | CD11b                 | BioLegend |
|         | CD11c                                | TACGCCTATAACTTG         | C0053        | S-HCL-3           | CD11c                 | BioLegend |
|         | CD122 (IL-2R beta)                   | TCATTTCTCCGATT          | C0246        | TU27              | CD122--IL-2R-B        | BioLegend |
|         | CD123                                | CTTCACTCTGTCAGG         | C0064        | 6H6               | CD123                 | BioLegend |
|         | CD124 (IL-4R alpha)                  | CCGTCCTGATAGATG         | C0363        | G077F6            | CD124--IL-4R-A        | BioLegend |
|         | CD127 (IL-7R alpha)                  | GTGTGTTGTCCTATG         | C0390        | A019D5            | CD127--IL-7Ra         | BioLegend |
|         | CD13                                 | TTTCAACGCCCTTTC         | C0364        | WM15              | CD13                  | BioLegend |
|         | CD134 (OX40)                         | AACCCACCGTTGTTA         | C0158        | Ber-ACT35 (ACT35) | CD134--OX40           | BioLegend |
|         | CD137 (4-1BB)                        | CAGTAAGTTCGGGAC         | C0355        | 4B4-1             | CD137--4-1BB          | BioLegend |
|         | CD137L (4-1BB Ligand)                | ATTCGCCTTACGCAA         | C0022        | 5F4               | CD137L--4-1BB-Ligand  | BioLegend |
|         | CD14                                 | TCTCAGACCTCCGTA         | C0081        | M5E2              | CD14.1                | BioLegend |
|         | CD140a (PDGFR alpha)                 | ATGCGCCGAGAATTA         | C0128        | 16A1              | CD140a--PDGFRA        | BioLegend |
|         | CD140b (PDGFR?)                      | CAATGGTTCACTGCC         | C0129        | 18A2              | CD140b--PDGFRB        | BioLegend |
|         | CD141 (Thrombomodulin)               | GGATAACCGCGCTTT         | C0163        | M80               | CD141--Thrombomodulin | BioLegend |

|                                |                 |       |           |                                 |           |
|--------------------------------|-----------------|-------|-----------|---------------------------------|-----------|
| CD144 (VE-Cadherin)            | TCCACTCATTCTGTA | C0400 | BV9       | CD144--VE-cadherin              | BioLegend |
| CD146                          | CCTTGGATAACATCA | C0134 | P1H12     | CD146                           | BioLegend |
| CD150 (SLAM)                   | GTCATTGTATGTCTG | C0870 | A12 (7D4) | CD150--SLAM                     | BioLegend |
| CD152 (CTLA-4)                 | ATGGTTCACGTAATC | C0151 | BNI3      | CD152--CTLA-4                   | BioLegend |
| CD154                          | GCTAGATAGATGCAA | C0032 | 24-31     | CD154                           | BioLegend |
| CD155 (PVR)                    | ATCACATCGTTGCCA | C0023 | SKII.4    | CD155--PVR                      | BioLegend |
| CD158 (KIR2DL1/S1/S3/S5)       | TATCAACCAACGCTT | C0420 | HP-MA4    | CD158                           | BioLegend |
| CD158b (KIR2DL2/L3, NKAT2)     | GACCCGAGTTTGAT  | C0592 | DX27      | CD158b--KIR2DL2--KIR2DL3--NKAT2 | BioLegend |
| CD158e1 (KIR3DL1, NKB1)        | GGACGCTTTCCTTGA | C0599 | DX9       | CD158e1--KIR3DL1--NKB1          | BioLegend |
| CD158f (KIR2DL5)               | AAAGTGATGCCACTG | C0600 | UP-R1     | CD158f--KIR2DL5                 | BioLegend |
| CD16                           | AAGTTCACTCTTTGC | C0083 | 3G8       | CD16                            | BioLegend |
| CD161                          | GTACGCAGTCCTTCT | C0149 | HP-3G10   | CD161                           | BioLegend |
| CD163                          | GCTTCTCCTTCTTA  | C0358 | GHI/61    | CD163.1                         | BioLegend |
| CD169 (Sialoadhesin, Siglec-1) | TACTCAGCGTGTTTG | C0206 | 7-239     | CD169--Sialoadhesin--Siglec-1   | BioLegend |
| CD178 (Fas-L)                  | CCGGTCCTCTGTATT | C0177 | NOK-1     | CD178--Fas-L                    | BioLegend |
| CD18                           | TATTGGGACACTTCT | C0385 | TS1/18    | CD18                            | BioLegend |
| CD183 (CXCR3)                  | GCGATGGTAGATTAT | C0140 | G025H7    | CD183 (CXCR3)                   | BioLegend |
| CD184 (CXCR4)                  | TCAGGTCCTTTCAAC | C0366 | 12G5      | CD184 (CXCR4)                   | BioLegend |
| CD185 (CXCR5)                  | AATTCAACCGTCGCC | C0144 | J252D4    | CD185 (CXCR5)                   | BioLegend |
| CD19                           | CTGGGCAATTACTCG | C0050 | HIB19     | CD19.1                          | BioLegend |
| CD194 (CCR4)                   | AGCTTACCTGCACGA | C0071 | L291H4    | CD194--CCR4                     | BioLegend |
| CD195 (CCR5)                   | CCAAAGTAAGAGCCA | C0141 | J418F1    | CD195--CCR5                     | BioLegend |
| CD196 (CCR6)                   | GATCCCTTTGTCACT | C0143 | G034E3    | CD196--CCR6                     | BioLegend |
| CD197 (CCR7)                   | AGTTCAGTCAACCGA | C0148 | G043H7    | CD197--CCR7                     | BioLegend |
| CD1a                           | GATCGTGTGTGTTA  | C0402 | HI149     | CD1a                            | BioLegend |
| CD1c                           | GAGCTACTTCACTCG | C0160 | L161      | CD1c                            | BioLegend |
| CD1d                           | TCGAGTCGCTTATCA | C0164 | 51.1      | CD1d                            | BioLegend |
| CD2                            | TACGATTTGTCAGGG | C0367 | TS1/8     | CD2.1                           | BioLegend |
| CD20                           | TTCTGGGTCCCTAGA | C0100 | 2H7       | CD20                            | BioLegend |

|                        |                  |       |           |                      |           |
|------------------------|------------------|-------|-----------|----------------------|-----------|
| CD201 (EPCR)           | GTTTCCTTGACCAAG  | C0069 | RCR-401   | CD201--EPCR          | BioLegend |
| CD204                  | TAGCGAGCCAGATGT  | C0399 | 7C9C20    | CD204                | BioLegend |
| CD206 (MMR)            | TCAGAACGTCTAACT  | C0205 | 15-2      | CD206--MMR           | BioLegend |
| anti-mouse/human CD207 | CGATTTGTATTCCCT  | C0437 | 4C7       | CD207--Langerin      | BioLegend |
| CD209 (DC-SIGN)        | TCACTGGACACTTAA  | C0597 | 9E9A8     | CD209--DC-SIGN       | BioLegend |
| CD21                   | AACCTAGTAGTTCGG  | C0181 | Bu32      | CD21                 | BioLegend |
| CD22                   | GGGTTGTTGTCTTTG  | C0393 | S-HCL-1   | CD22.1               | BioLegend |
| CD223 (LAG-3)          | CATTGTCTGCCGGT   | C0152 | 11C3C65   | CD223--LAG-3         | BioLegend |
| CD224                  | CTGATGAGATGTCAG  | C1052 | KF29      | CD224                | BioLegend |
| CD226 (DNAM-1)         | TCTCAGTGTGTTGTGG | C0368 | 11A8      | CD226--DNAM-1        | BioLegend |
| CD23                   | TCTGTATAACCGTCT  | C0897 | EBVCS-5   | CD23                 | BioLegend |
| CD235ab                | GCTCCTTACACGTA   | C0196 | HIR2      | CD235ab              | BioLegend |
| CD24                   | AGATTCCTTCGTGTT  | C0180 | ML5       | CD24.1               | BioLegend |
| CD244 (2B4)            | TCGCTTGGATGGTAG  | C0189 | C1.7      | CD244--2B4           | BioLegend |
| CD25                   | TTTGTCTGTACGCC   | C0085 | BC96      | CD25                 | BioLegend |
| CD252 (OX40L)          | TTTAGTGATCCGACT  | C0021 | 11C3.1    | CD252--OX40L         | BioLegend |
| CD254 (TRANCE, RANKL)  | TCCGTGTTAGTTTGT  | C0356 | MIH24     | CD254--TRANCE--RANKL | BioLegend |
| CD257 (BAFF, BLYS)     | CAGAGCACCCATTAA  | C0863 | 1D6       | CD257--BAFF--BLYS    | BioLegend |
| CD258 (LIGHT)          | ACTTCCCTGTAGAAA  | C1056 | T5-39     | CD258--LIGHT         | BioLegend |
| CD26                   | GGTGGCTAGATAATG  | C0396 | BA5b      | CD26                 | BioLegend |
| CD267 (TACI)           | AGTGATGGAGCGAAC  | C0247 | 1A1       | CD267--TACI          | BioLegend |
| CD268 (BAFF-R)         | CGAAGTCGATCCGTA  | C0215 | 11C1      | CD268--BAFF-R        | BioLegend |
| CD269 (BCMA)           | CAGATGATCCACCAT  | C0056 | 19F2      | CD269--BCMA          | BioLegend |
| CD27                   | GCACTCCTGCATGTA  | C0154 | O323      | CD27.1               | BioLegend |
| CD270 (HVEM, TR2)      | TGATAGAAACAGACC  | C0020 | 122       | CD270--HVEM--TR2     | BioLegend |
| CD272 (BTLA)           | GTTATTGGACTAAGG  | C0170 | MIH26     | CD272--BTLA          | BioLegend |
| CD273 (B7-DC, PD-L2)   | TCAACGCTTGGCTAG  | C0008 | 24F.10C12 | CD273--B7-DC--PD-L2  | BioLegend |
| CD274 (B7-H1, PD-L1)   | GTTGTCCGACAATAC  | C0007 | 29E.2A3   | CD274--B7-H1--PD-L1  | BioLegend |
| CD275 (B7-H2, ICOSL)   | GTGCATTCAACAGTA  | C0009 | 2D3       | CD275--B7-H2--ICOSL  | BioLegend |

|                                   |                 |       |          |                     |           |
|-----------------------------------|-----------------|-------|----------|---------------------|-----------|
| anti-human/mouse/rat CD278 (ICOS) | CGCGCACCCATTAAA | C0171 | C398.4A  | CD278--ICOS         | BioLegend |
| CD279                             | ACAGCGCCGTATTTA | C0088 | EH12.2H7 | CD279--PD-1         | BioLegend |
| CD28                              | TGAGAACGACCCTAA | C0386 | CD28.2   | CD28.1              | BioLegend |
| CD29                              | GTATTCCTCAGTCA  | C0369 | TS2/16   | CD29                | BioLegend |
| CD294 (CRTH2)                     | TGTTTACGAGAGCCC | C0102 | BM16     | CD294--CRTH2        | BioLegend |
| CD3                               | CTCATTGTAACCTCT | C0034 | UCHT1    | CD3                 | BioLegend |
| CD30                              | TCAGGGTGTGCTGTA | C0028 | BY88     | CD30                | BioLegend |
| CD303 (BDCA-2)                    | GAGATGTCCGAATTT | C0370 | 201A     | CD303--BDCA-2       | BioLegend |
| CD304 (Neuropilin-1)              | GGACTAAGTTTCGTT | C0406 | 12C2     | CD304--Neuropilin-1 | BioLegend |
| CD305 (LAIR1)                     | ATTTCCATTCCCTGT | C0590 | NKTA255  | CD305--LAIR1        | BioLegend |
| CD307d (FcRL4)                    | CGATTTGATCTGCCT | C0828 | 413D12   | CD307d--FcRL4       | BioLegend |
| CD307e (FcRL5)                    | TCACGCAGTCCTCAA | C0829 | 509f6    | CD307e--FcRL5       | BioLegend |
| CD31                              | ACCTTTATGCCACGG | C0124 | WM59     | CD31                | BioLegend |
| CD314 (NKG2D)                     | CGTGTTTGTTCCTCA | C0165 | 1D11     | CD314--NKG2D        | BioLegend |
| CD319 (CRACC)                     | AGTATGCCATGTCTT | C0830 | 162.1    | CD319--CRACC        | BioLegend |
| CD32                              | GCTTCCGAATTACCG | C0142 | FUN-2    | CD32                | BioLegend |
| CD324 (E-Cadherin)                | ATCCTTCTCCCTTTC | C0135 | 67A4     | CD324--E-Cadherin   | BioLegend |
| CD325 (N-Cadherin)                | CCTTCCCTTTCCTCT | C0433 | 8C11     | CD325--N-Cadherin   | BioLegend |
| CD326 (Ep-CAM)                    | TTCCGAGCAAGTATC | C0123 | 9C4      | CD326--EpCAM        | BioLegend |
| CD328 (Siglec-7)                  | CTTAGCATTTCACTG | C0902 | 6-434    | CD328--Siglec-7     | BioLegend |
| CD33                              | TAActCAGGGCCTAT | C0052 | P67.6    | CD33.1              | BioLegend |
| CD335 (NKp46)                     | ACAATTTGAACAGCG | C0101 | 900      | CD335--NKp46        | BioLegend |
| CD336 (NKp44)                     | GGGCAATTAGCGAGT | C0802 | P44-8    | CD336--NKp44        | BioLegend |
| CD337 (NKp30)                     | AAAGTCACTCTGCCG | C0801 | P30-15   | CD337--NKp30        | BioLegend |
| CD34                              | GCAGAAATCTCCCTT | C0054 | 581      | CD34.1              | BioLegend |
| CD35                              | ACTTCCGTCGATCTT | C0167 | E11      | CD35                | BioLegend |
| CD352 (NTB-A)                     | AGTTTCCACTCAGGC | C0864 | NT-7     | CD352--NTB-A        | BioLegend |
| CD357 (GITR)                      | ACCTTTGACACTCG  | C0360 | 108-17   | CD357--GITR         | BioLegend |
| CD36                              | TTCTTTGCCTTGCCA | C0407 | 5-271    | CD36.1              | BioLegend |

|                             |                  |       |         |                      |           |
|-----------------------------|------------------|-------|---------|----------------------|-----------|
| CD360 (IL-21R)              | GAGGATGATGCCATG  | C0985 | 17A12   | CD360--IL-21R        | BioLegend |
| CD366 (Tim-3)               | TGTCCTACCCAAGT   | C0169 | F38-2E2 | CD366--Tim-3         | BioLegend |
| CD370 (CLEC9A/DNGR1)        | CTGCATTTTCAGTAAG | C0207 | 8F9     | CD370--CLEC9A--DNGR1 | BioLegend |
| CD38                        | TGTACCCGCTTGTGA  | C0389 | HIT2    | CD38.1               | BioLegend |
| CD39                        | TTACCTGGTATCCGT  | C0176 | A1      | CD39                 | BioLegend |
| CD4                         | TGTTCCCGCTCAACT  | C0072 | RPA-T4  | CD4.1                | BioLegend |
| CD40                        | CTCAGATGGAGTATG  | C0031 | 5C3     | CD40.1               | BioLegend |
| CD41                        | ACGTTGTGGCCTTGT  | C0353 | HIP8    | CD41                 | BioLegend |
| CD42b                       | TCCTAGTACCGAAGT  | C0216 | HIP1    | CD42b--GP1BB         | BioLegend |
| anti-mouse/human CD44       | TGGCTTCAGGTCCTA  | C0073 | IM7     | CD44.1               | BioLegend |
| CD45                        | TGCAATTACCCGGAT  | C0391 | HI30    | CD45                 | BioLegend |
| anti-mouse/human CD45R/B220 | CCTACACCTCATAAT  | C0103 | RA3-6B2 | CD45RA               | BioLegend |
| CD45RA                      | TCAATCCTTCCGCTT  | C0063 | HI100   | CD45R--B220          | BioLegend |
| CD45RO                      | CTCCGAATCATGTTG  | C0087 | UCHL1   | CD45RO               | BioLegend |
| CD47                        | GCATTCTGTACCTA   | C0026 | CC2C6   | CD47.1               | BioLegend |
| CD48                        | CTACGACGTAGAAGA  | C0029 | BJ40    | CD48.1               | BioLegend |
| CD49a                       | ACTGATGGACTCAGA  | C0575 | TS2/7   | CD49a                | BioLegend |
| CD49b                       | GCTTTCTTCAGTATG  | C0371 | P1E6-C5 | CD49b                | BioLegend |
| CD49d                       | CCATTCAACTTCCGG  | C0576 | 9F10    | CD49d                | BioLegend |
| anti-human/mouse CD49f      | TTCCGAGGATGATCT  | C0070 | GoH3    | CD49f                | BioLegend |
| CD5                         | CATTAACGGGATGCC  | C0138 | UCHT2   | CD5.1                | BioLegend |
| CD52                        | CTTTGTACGAGCAAA  | C0033 | HI186   | CD52.1               | BioLegend |
| CD54                        | CTGATAGACTTGAGT  | C0217 | HA58    | CD54                 | BioLegend |
| CD56                        | TCCTTTCCTGATAGG  | C0047 | 5.1H11  | CD56                 | BioLegend |
| CD57 Recombinant            | AACTCCCTATGGAGG  | C0168 | QA17A04 | CD57-Recombinant     | BioLegend |
| CD58 (LFA-3)                | GTTCCCTATGGACGAC | C0174 | TS2/9   | CD58--LFA-3          | BioLegend |
| CD62E                       | CTCCCTGTGGCTTAA  | C0248 | HAE-1f  | CD62E                | BioLegend |
| CD62L                       | GTCCCTGCAACTTGA  | C0147 | DREG-56 | CD62L                | BioLegend |
| CD62P (P-Selectin)          | CCTTCCGTATCCCTT  | C0218 | AK4     | CD62P--P-Selectin    | BioLegend |

|                             |                  |       |                |                           |           |
|-----------------------------|------------------|-------|----------------|---------------------------|-----------|
| CD64                        | AAGTATGCCCTACGA  | C0162 | 10.1           | CD64                      | BioLegend |
| CD66a/c/e                   | GGGACAGTTCGTTTC  | C0188 | ASL-32         | CD66a--CD66c--CD66e       | BioLegend |
| CD66b                       | AGCTGTAAGTTTCGG  | C0166 | 6/40c          | CD66b                     | BioLegend |
| CD69                        | GTCTCTTGCTTAAA   | C0146 | FN50           | CD69.1                    | BioLegend |
| CD7                         | TGGATTCCCGGACTT  | C0066 | CD7-6B7        | CD7.1                     | BioLegend |
| CD70                        | CGCGAACATAAGAAG  | C0027 | 113-16         | CD70.1                    | BioLegend |
| CD71                        | CCGTGTTCCCTCATTA | C0394 | CY1G4          | CD71                      | BioLegend |
| CD73 (Ecto-5'-nucleotidase) | CAGTTCCTCAGTTCCG | C0577 | AD2            | CD73--Ecto-5-nucleotidase | BioLegend |
| CD79b (Ig beta)             | ATTCTTCAACCGAAG  | C0187 | CB3-1          | CD79b--Ig-B               | BioLegend |
| CD8                         | GCGCAACTTGATGAT  | C0046 | SK1            | CD8                       | BioLegend |
| CD80                        | ACGAATCAATCTGTG  | C0005 | 2D10           | CD80.1                    | BioLegend |
| CD81 (TAPA-1)               | GTATCCTTCCTTGCC  | C0373 | 5A6            | CD81--TAPA-1              | BioLegend |
| CD82                        | TCCCACTTCCGCTTT  | C0920 | ASL-24         | CD82.1                    | BioLegend |
| CD83                        | CCACTCATTTCCGGT  | C0359 | HB15e          | CD83.1                    | BioLegend |
| CD85j (ILT2)                | CCTTGTGAGGCTATG  | C0896 | GHI/75         | CD85j--ILT2               | BioLegend |
| CD86                        | GTCTTTGTCAGTGCA  | C0006 | IT2.2          | CD86.1                    | BioLegend |
| CD88 (C5aR)                 | GCCGCATGAGAAACA  | C1046 | S5/1           | CD88--C5aR                | BioLegend |
| CD94                        | CTTCCGGTCCTACA   | C0867 | DX22           | CD94                      | BioLegend |
| CD95 (Fas)                  | CCAGCTCATTAGAGC  | C0156 | DX2            | CD95--Fas                 | BioLegend |
| CD96 (TACTILE)              | TGGCCTATAAATGGT  | C0175 | NK92.39        | CD96--TACTILE             | BioLegend |
| CD98                        | GCACCAACAGCCATT  | C0374 | MEM-108        | CD98                      | BioLegend |
| CD99                        | ACCCGTCCCTAAGAA  | C0845 | 3B2/TA8        | CD99.1                    | BioLegend |
| CLEC12A                     | CATTAGAGTCTGCCA  | C0853 | 50C1           | CLEC12A.1                 | BioLegend |
| CX3CR1                      | AGTATCGTCTCTGGG  | C0179 | K0124E1        | CX3CR1.1                  | BioLegend |
| DR3 (TRAMP)                 | GAGTTCCTCAGTTC   | C1057 | JD3            | DR3--TRAMP                | BioLegend |
| EGFR                        | GCTTAACATTGGCAC  | C0132 | AY13           | EGFR.1                    | BioLegend |
| Fc epsilon RI alpha         | CTCGTTTCCGATCG   | C0352 | AER-37 (CRA-1) | FceRIa                    | BioLegend |
| GARP (LRRC32)               | AGGTATGGTAGAGTA  | C0901 | 7B11           | GARP--LRRC32              | BioLegend |
| GPR56                       | GCCTAGTTCCGTTT   | C0912 | CG4            | GPR56                     | BioLegend |



|                                          |                  |       |          |                                       |           |
|------------------------------------------|------------------|-------|----------|---------------------------------------|-----------|
| HLA-A,B,C                                | TATGCGAGGCTTATC  | C0058 | W6/32    | HLA-A2                                | BioLegend |
| HLA-A2                                   | GAACATTTCCGACAA  | C0899 | BB7.2    | HLA-A-B-C                             | BioLegend |
| HLA-DR                                   | AATAGCGAGCAAGTA  | C0159 | L243     | HLA-DR                                | BioLegend |
| HLA-E                                    | GAGTCGAGAAATCAT  | C0918 | 3D12     | HLA-E.1                               | BioLegend |
| Ig light chain kappa                     | AGCTCAGCCAGTATG  | C0894 | MHK-49   | Ig-light-chain-K                      | BioLegend |
| Ig light chain lambda                    | CAGCCAGTAAGTCAC  | C0898 | MHL-38   | Ig-light-chain-L                      | BioLegend |
| IgD                                      | CAGTCTCCGTAGAGT  | C0384 | IA6-2    | IgD                                   | BioLegend |
| IgG Fc                                   | CTGGAGCGATTAGAA  | C0375 | M1310G05 | IgG-Fc                                | BioLegend |
| IgM                                      | TAGCGAGCCCCGTATA | C0136 | MHM-88   | IgM                                   | BioLegend |
| anti-human/mouse integrin $\beta$ 7      | TCCTTGGATGTACCG  | C0214 | FIB504   | integrin-B-7                          | BioLegend |
| KLRG1 (MAFA)                             | CTTATTTCTGCCCT   | C0153 | SA231A2  | KLRG1--MAFA                           | BioLegend |
| LOX-1                                    | ACCCTTTACCGAATA  | C0591 | 15C4     | LOX-1                                 | BioLegend |
| anti-mouse/human Mac-2<br>(Galectin-3)   | GATGCAATTAGCCGG  | C0895 | M3/38    | Mac-2--Galectin-3                     | BioLegend |
| Notch 1                                  | AATCTGTAGTGCGTT  | C0213 | MHN1-519 | Notch-1                               | BioLegend |
| Notch 3                                  | CTATTGGACGTATCT  | C0233 | MHN3-21  | Notch-3                               | BioLegend |
| Podocalyxin                              | GAGCCGGTATAATGC  | C1051 | mAb 84   | Podocalyxin                           | BioLegend |
| Podoplanin                               | GGTTACTCGTTGTGT  | C0127 | NC-08    | Podoplanin                            | BioLegend |
| TCR alpha/beta                           | CGTAACGTAGAGCGA  | C0224 | IP26     | TCR-A--TCR-B                          | BioLegend |
| TCR gamma/delta                          | CTTCCGATTCATTCA  | C0139 | B1       | TCR-G--TCR-D                          | BioLegend |
| TCR V alpha 24-J alpha 18 (iNKT<br>cell) | AACTTCTGTGGTAGC  | C0584 | 6B11     | TCR-V-A-24-J-A-18--iNKT-cell          | BioLegend |
| TCR V alpha 7.2                          | TACGAGCAGTATTCA  | C0581 | 3C10     | TCR-V-A-7.2                           | BioLegend |
| TCR V beta 13.1                          | TTATGGACGTATGGT  | C0908 | H131     | TCR-V-B-13.1                          | BioLegend |
| TCR V delta 2                            | TCAGTCAGATGGTAT  | C0582 | B6       | TCR-V-D-2                             | BioLegend |
| TCR V gamma 9                            | AAGTGATGGTATCTG  | C0583 | B3       | TCR-V-G-9                             | BioLegend |
| TIGIT (VSTM3)                            | TTGCTTACCGCCAGA  | C0089 | A15153G  | TIGIT--VSTM3                          | BioLegend |
| TSLPR (TSLP-R)                           | CAGTCCTCTCTGTCA  | C0387 | 1D3      | TSLPR--TSLP-R                         | BioLegend |
| XCR1                                     | AAGACGCATGTCAAC  | C0208 | S15046E  | XCR1.1                                | BioLegend |
| Armenian Hamster IgG Isotype<br>Ctrl     | CCTGTCATTAAGACT  | C0241 | HTK888   | armenian-hamster-IgG-isotype-<br>ctrl | BioLegend |

|             |                                 |                  |       |          |                                 |            |
|-------------|---------------------------------|------------------|-------|----------|---------------------------------|------------|
|             | Mouse IgG1, kappa isotype Ctrl  | GCCGGACGACATTAA  | C0090 | MOPC-21  | mouse-IgG1--kappa-isotype-ctrl  | BioLegend  |
|             | Mouse IgG2a, kappa isotype Ctrl | CTCCTACCTAAACTG  | C0091 | MOPC-173 | mouse-IgG2a--kappa-isotype-ctrl | BioLegend  |
|             | Rat IgG1, kappa isotype Ctrl    | ATCAGATGCCCTCAT  | C0236 | RTK2071  | rat-IgG1--kappa-isotype-ctrl    | BioLegend  |
|             | Rat IgG2a, kappa Isotype Ctrl   | AAGTCAGGTTCTGTTT | C0238 | RTK2758  | rat-IgG2a--kappa-isotype-ctrl   | BioLegend  |
|             | Rat IgG2b, kappa Isotype Ctrl   | GATTCTTGACGACCT  | C0095 | RTK4530  | rat-IgG2b--kappa-isotype-ctrl   | BioLegend  |
|             |                                 |                  |       |          | mouse-IgG2b--kappa-isotype-ctrl | BioLegend  |
| CyTOF       | CD45                            | 89               | Y     | HI30     | -                               | BioLegend  |
|             | EpCAM                           | 115              | In    | 9C4      | -                               | BioLegend  |
|             | CD7                             | 139              | La    | M-T701   | -                               | BD         |
|             | CD15                            | 140              | Ce    | W6D3     | -                               | Bioscience |
|             | CD3                             | 141              | Pr    | UCHT1    | -                               | BioLegend  |
|             | CD19                            | 142              | Nd    | HIB19    | -                               | BioLegend  |
|             | CD163                           | 144              | Nd    | GHI61    | -                               | BioLegend  |
|             | CD4                             | 145              | Nd    | RPA-T4   | -                               | Thermo     |
|             | CD8a                            | 146              | Nd    | RPA-T8   | -                               | BioLegend  |
|             | CD11c                           | 147              | Sm    | BU15     | -                               | Thermo     |
|             | CD14                            | 148              | Nd    | M5E2     | -                               | BioLegend  |
|             | CD127                           | 149              | Sm    | A019D5   | -                               | BioLegend  |
|             | CD123                           | 151              | Eu    | 6H6      | -                               | Thermo     |
|             | gdTCR                           | 152              | Sm    | 5A6.E9   | -                               | ATCC       |
|             | CD45RA                          | 153              | Eu    | HI100    | -                               | BioLegend  |
|             | TIM3                            | 154              | Sm    | F38-2E2  | -                               | BioLegend  |
|             | TIGIT                           | 155              | Gd    | A15153G  | -                               | BioLegend  |
|             | PD-L1                           | 156              | Gd    | 29E.2A3  | -                               | BioLegend  |
|             | Integrin a4                     | 157              | Gd    | 9F10     | -                               | BioLegend  |
|             | CD27                            | 158              | Gd    | O323     | -                               | BioLegend  |
| Cd137_4-1BB | 159                             | Tb               | 4B4-1 | -        | Thermo                          |            |
| Tbet        | 160                             | Gd               | 4B10  | -        | Thermo                          |            |
| CTLA-4      | 161                             | Dy               | 14D3  | -        | Thermo                          |            |

|             |     |    |          |   |                  |
|-------------|-----|----|----------|---|------------------|
| FOXP3       | 162 | Dy | PCH101   | - | Thermo           |
| CD31        | 163 | Dy | WM59     | - | BioLegend        |
| Integrin b7 | 165 | Ho | FIB504   | - | BioLegend        |
| CD141_BDCA3 | 166 | Er | M80      | - | BioLegend        |
| CCR7        | 167 | Er | GO43H7   | - | BioLegend        |
| Ki-67       | 168 | Er | Ki-67    | - | BioLegend        |
| CD25        | 169 | Tm | M-A251   | - | BioLegend        |
| CD1c_BDCA1  | 170 | Er | L161     | - | BioLegend        |
| CD38        | 172 | Yb | HIT2     | - | BioLegend        |
| ICOS        | 173 | Yb | C398.4A  | - | BioLegend        |
| HLA-DR      | 174 | Yb | L243     | - | BioLegend        |
| PD-1        | 175 | Lu | EH12.2H7 | - | BioLegend        |
| CD56        | 176 | Yb | NCAM16.2 | - | BD<br>Bioscience |
| CD16        | 209 | Bi | 3G8      | - | BioLegend        |

**Table S3. Marker features used to identify coarse and fine cell annotations in blood and biopsies from CPI colitis.** Lists are provided for this predominantly steroid-experienced data set, and external steroid-naïve data set (Luoma et al. Cell 2020). Features are transcripts, with the exception of CITEseq features which are specifically noted.

**Biopsies:**

|                |                                                                                 |                                  |                                                            |
|----------------|---------------------------------------------------------------------------------|----------------------------------|------------------------------------------------------------|
| B cells        | PTPRC, MS4A1, CD19, CD79A                                                       | B cycling                        | MIK67, ACTG1, TUBB, COTL1, STMN1, HMGB2                    |
|                |                                                                                 | B memory                         | CD27, IGHG1, IGHG2, IGHG3, IGHG4, IGHA1, IGHA2             |
|                |                                                                                 | B naïve                          | IGHD, IGHM                                                 |
| CD4T           | PTPRC, CD3D, CD3E, CD4, CD8A (neg), CD8B (neg),<br>CITEseq: CD3, CD4, CD8 (neg) | CD4T fh-like                     | CXCR5, BCL6                                                |
|                |                                                                                 | CD4T memory                      | PLP2, LTB, S100A11, S100A4, LGALS1, TIMP1, IL7R, VIM, AQP3 |
|                |                                                                                 | CD4T naïve                       | CCR7, TCF7, SELL, KLF2, LEF1, SOX4                         |
|                |                                                                                 | CD4T reg                         | FOXP3, IL2RA, CTLA4, ICOS, TIGIT, RTKN2, BATF              |
|                |                                                                                 | CD4T RM                          | ITGA1, CD101, CD69, ITGAE, CCR6                            |
| CD8T           | PTPRC, CD3D, CD3E, CD8A, CD8B, CD4 (neg),<br>CITEseq: CD3, CD4, CD8 (neg)       | CD8T GZMB                        | GZMB, GNLY, GZMH, NKG7                                     |
|                |                                                                                 | CD8T GZMK                        | GZMK, EOMES, DUSP2, CCL5                                   |
|                |                                                                                 | CD8T naïve                       | CCR7, TCF7, SELL, KLF2, LEF1, SOX4                         |
|                |                                                                                 | CD8T RM                          | ITGA1, CD101, CD69, ITGAE, CCR6                            |
| Cycling        | MIK67, ACTG1, TUBB, COTL1, STMN1, HMGB2                                         | Cycling myeloid                  | HLA-DRA, HLA-DPA1, HLA-DRB5, HLA-DRA                       |
|                |                                                                                 | Cycling plasma                   | MZB1, IGKC, IGLC2, JCHAIN                                  |
|                |                                                                                 | Cycling T                        | CD3D, CD3E, CD8A, CD4                                      |
| Endothelial    | PECAM1, CDH5, CLDN5                                                             | Endothelial arterial             | GJA4, IGFBP3, UNC5B                                        |
|                |                                                                                 | Endothelial lymphatic            | LYVE1, PROX1, RELN                                         |
|                |                                                                                 | Endothelial venous               | MADCAM1, APLNR, PRCP                                       |
| Enteric neural | CRYAB, SPARC, HAND2, ADGRB3, PLP1                                               | -                                | -                                                          |
| Epithelial     | EPCAM, FABP1, PIGR, KRT8                                                        | Epithelial absorptive colonocyte | FABP2, APOE, AQP8, SLC26A2, FABP1, CKB, AQP8, FABP6, IL32  |

|                     |                                                                            |                                          |                                                                            |
|---------------------|----------------------------------------------------------------------------|------------------------------------------|----------------------------------------------------------------------------|
|                     |                                                                            | Epithelial BEST4_OTOP2                   | BEST4, OTOP2, CA7                                                          |
|                     |                                                                            | Epithelial EEC                           | CHGA, TPH1, NEUROD1, RXFP4                                                 |
|                     |                                                                            | Epithelial ISC                           | LGR5, OLFM4, ASCL2, MYC                                                    |
|                     |                                                                            | Epithelial secretory goblet              | FOXA2, INSM1, HES6, MUC2, SPINK4, WFDC2                                    |
|                     |                                                                            | Epithelial TA                            | MKI67, TOP2A, UBE2C                                                        |
| GD T cells          | TRDC, TRGC1, TRGC2, TRDV1, TRDV2, TRDV3, TRGV1, TRGV2, TRGV3, TRGV4, TRGV6 | -                                        | -                                                                          |
| ILC3                | KIT, RORC, IL7R, LTB CD3D (neg)                                            | -                                        | -                                                                          |
| Mast                | IL18R1, KIT, CPA3, TPSB2, TPSAB1, GATA2                                    | -                                        | -                                                                          |
| Mesenchymal Stromal | THY1, COL1A2, VIM, COL3A1, PDGFRA                                          | Mesenchymal pericyte                     | KCNJ8, ABCC9, RGS5, CSPG4                                                  |
|                     |                                                                            | Mesenchymal stromal activated fibroblast | TIMP1, IL1R1, MMP1, MMP3                                                   |
|                     |                                                                            | Mesenchymal stromal myofibroblast        | VIM, FOXF1, TAGLN, RSPO2, ACTA2, RGS5 (neg)                                |
|                     |                                                                            | Mesenchymal stromal S1                   | ADAMDEC1, FABP5, CTSC                                                      |
|                     |                                                                            | Mesenchymal stromal S2                   | FRZB, SOX6, F3                                                             |
|                     |                                                                            | Mesenchymal stromal S3                   | C7, ASPN, OGN                                                              |
|                     |                                                                            | Mesenchymal stromal S4                   | CCL19, C3, CD74                                                            |
|                     |                                                                            | Mesenchymal transitional stromal         | IGFB4, DCN, ADH1, NNMT                                                     |
| Myeloid             | PTPRC, HLA-DRA, HLA-DPA1, HLA-DRB5, HLA-DRA, C1QA, C1QB, C1QC              | Myeloid activated DC                     | FLT3, LAMP3, CD40, CD86, CD274, CCR7, CCL17, CCL19, CCL22, EBI3            |
|                     |                                                                            | Myeloid cDC1                             | FLT3, CD1C, CD1D, CLEC10A, FCER1A, FCGR2B                                  |
|                     |                                                                            | Myeloid cDC2                             | FLT3, BATF3, CLEC9A, XCR1, CADM1, CLNK, C1orf54                            |
|                     |                                                                            | Myeloid macrophage                       | MERTK, CTSC, CTSD, GLUL, PLD3, CD14, CD68, FCGR3A, CSF1R, C1QA, C1QB, C1QC |
|                     |                                                                            | Myeloid pDC                              | IL3RA, SERPINF1, GZMB, CLEC4C, PTGDS, IRF7                                 |
| NK                  | FCGR3A, NCAM1, KLRB1, KLRF1, FCER1G, CD3D (neg)                            | -                                        | -                                                                          |
| Plasma cells        | MZB1, IGKC, IGLC2, JCHAIN                                                  | Plasma IgA                               | IGHA1, IGHA2                                                               |
|                     |                                                                            | Plasma IgG                               | IGHG1, IGHG2, IGHG3, IGHG4, IGHGP                                          |
|                     |                                                                            | Plasma IgM                               | IGHM                                                                       |

**Blood:**

|              |                                                                            |                      |                                                                                           |
|--------------|----------------------------------------------------------------------------|----------------------|-------------------------------------------------------------------------------------------|
| B cells      | PTPRC, MS4A1, CD19                                                         | B memory             | CD27, IGHG1, IGHG2, IGHG3, IGHG4, IGHA1, IGHA2                                            |
|              |                                                                            | B naïve              | IGHD, IGHM                                                                                |
| CD4T         | PTPRC, CD3D, CD3E, CD4, CD8A (neg), CD8B (neg),<br>CITEseq: CD4, CD8 (neg) | CD4T central memory  | PLP2, LTB, S100A11, S100A4, LGALS1, TIMP1, IL7R, VIM, AQP3; CITEseq: CD62L , CD45RA (neg) |
|              |                                                                            | CD4T effector        | CITEseq: CD62L (neg) , CD45RA                                                             |
|              |                                                                            | CD4T naïve           | CCR7, TCF7, SELL, KLF2, LEF1, SOX4; CITEseq: CD62L, CD45RA                                |
| CD8T         | PTPRC, CD3D, CD3E, CD8A, CD8B, CD4 (neg),<br>CITEseq: CD4 (neg), CD8       | CD8T GZMB            | GZMB, GNLY, GZMH, NKG7                                                                    |
|              |                                                                            | CD8T GZMK            | GZMK, EOMES, DUSP2, CCL5                                                                  |
|              |                                                                            | CD8T naïve           | CCR7, TCF7, SELL, KLF2, LEF1, SOX4                                                        |
| Myeloid      | ACTG1, TUBB, COTL1, STMN1, HMGB2, MKI67                                    | -                    | -                                                                                         |
| GD T cells   | TRDC, TRGC1, TRGC2, TRDV1, TRDV2, TRDV3, TRGV1, TRGV2, TRGV3, TRGV4, TRGV6 | -                    | -                                                                                         |
| MAIT         | TRAV1-2, KLRB1, DUSP1, ZBTB16, IL7R                                        | -                    | -                                                                                         |
| Myeloid      | PTPRC, IL1B, HLA-DRA, FCGR3A, S100A8, LST1                                 | Myeloid classical    | CD14, VCAN, S100A8, S100A9, LYZ, IL1B                                                     |
|              |                                                                            | Myeloid DC           | HLA-DPA1, HLA-DRB5, HLA-DRA, CLEC10A, CD1C                                                |
|              |                                                                            | Myeloid nonclassical | LST1, CSF1R, LILRB2, TNFRSF1B, FCGR3A, MS4A7                                              |
| NK           | FCGR3A, NCAM1, KLRB1, KLRF1, FCER1G, CD3D (neg)                            | -                    | -                                                                                         |
| pDCs         | IL3RA, SERPINF1, GZMB, CLEC4C, PTGDS, IRF7                                 | -                    | -                                                                                         |
| Plasma cells | MZB1, IGKC, IGLC2, JCHAIN, IGLV3-1, IGHA1                                  | -                    | -                                                                                         |
| Platelets    | PPBP, PF4, GP9                                                             | -                    | -                                                                                         |

**Luoma CD45 sorted:**

|         |                                                 |
|---------|-------------------------------------------------|
| B cells | MS4A1, CD19, CD79A                              |
| CD4T    | CD3D, CD3E, CD4, CD8A (neg), CD8B (neg)         |
| CD8T    | CD3D, CD3E, CD8A, CD8B, CD4 (neg)               |
| cDC1    | FLT3, CD1C, CD1D, CLEC10A, FCER1A, FCGR2B       |
| cDC2    | FLT3, BATF3, CLEC9A, XCR1, CADM1, CLNK, C1orf54 |
| cycling | MIK67, ACTG1, TUBB, COTL1, STMN1, HMGB2         |

|              |                                                                            |
|--------------|----------------------------------------------------------------------------|
| GD           | TRGC2, all [TRDV_] and [TRGV_]                                             |
| ILC3         | KIT, RORC, IL7R, LTB CD3D (neg)                                            |
| macrophage   | MERTK, CTSC, CTSD, GLUL, PLD3, CD14, CD68, FCGR3A, CSF1R, C1QA, C1QB, C1QC |
| mast         | IL18R1, KIT, CPA3, TPSB2, TPSAB1, GATA2                                    |
| NK           | FCGR3A, NCAM1, KLRB1, KLRF1, FCER1G, CD3D (neg)                            |
| pDC          | IL3RA, SERPINF1, GZMB, CLEC4C, PTGDS, IRF7                                 |
| plasma cells | MZB1, IGKC, IGLC2, JCHAIN                                                  |

**Luoma CD3 sorted:**

|           |                                         |              |                                                                                                |
|-----------|-----------------------------------------|--------------|------------------------------------------------------------------------------------------------|
| CD4T      | CD4, CD8A (neg), CD8B (neg)             | CD4T fh      | CXCR5, BCL6                                                                                    |
|           |                                         | CD4T naive   | CCR7, TCF7, SELL, KLF2, LEF1, SOX4                                                             |
|           |                                         | CD4T reg     | FOXP3, IL2RA, CTLA4, ICOS, TIGIT, RTKN2, BATF                                                  |
|           |                                         | CD4T RM act  | CD38, HLA-DRA, ITGA1, CD101, CD69, ITGAE                                                       |
|           |                                         | CD4T RM-mem  | CD38 (lo), HLA-DRA (lo), ITGA1, CD101, CD69, ITGAE, PLP2, S100A11, S100A4, LGALS1, TIMP1, IL7R |
| CD8T      | CD8A, CD8B, CD4 (neg)                   | CD8T GZMB    | GZMB, GNLY, GZMH, NKG7                                                                         |
|           |                                         | CD8T GZMK    | GZMK, EOMES, DUSP2, CCL5                                                                       |
|           |                                         | CD8T naive   | CCR7, TCF7, SELL, KLF2, LEF1, SOX4                                                             |
|           |                                         | CD8T RM      | ITGA1, CD101, CD69, ITGAE                                                                      |
| T CD4-CD8 | CD4, CD8A, CD8B                         | -            | -                                                                                              |
| cycling   | MIK67, ACTG1, TUBB, COTL1, STMN1, HMGB2 | cycling CD4T | CD4, CD8A (neg), CD8B (neg)                                                                    |
|           |                                         | cycling CD8T | CD4, CD8A, CD8B                                                                                |
|           |                                         | cycling GD   | TRGC2, all [TRDV_] and [TRGV_]                                                                 |
| GD        | TRGC2, all [TRDV_] and [TRGV_]          | -            | -                                                                                              |
| MAIT      | TRAV1-2, KLRB1, DUSP1, ZBTB16, IL7R     | -            | -                                                                                              |

|      |                                                          |   |   |
|------|----------------------------------------------------------|---|---|
| nonT | MS4A1, CD19, CD79A, MZB1, JCHAIN, CD68, C1QA, C1QB, C1QC | - | - |
|------|----------------------------------------------------------|---|---|
