# Supplementary material for: Dysregulation of CD4+ and CD8+ resident memory T, myeloid, and stromal cells in steroid-experienced, checkpoint inhibitor colitis
Source: PubMed Central journal article supplement — J Immunother Cancer. 2024 Apr 19;12(4):e008628. doi: 10.1136/jitc-2023-008628 (PMC11033653; doi:10.1136/jitc-2023-008628), 2024-04-19
Supplement: jitc-2023-008628supp011.pdf [file jitc-2023-008628supp011.pdf]

## Supplementary Materials

**Figure S1.** Single-cell data in UMAP space from **Fig. 1B** (biopsy) and **Fig. 1C** (blood), separately displayed by immunosuppression for biopsies **(A)**, and for blood data, by disease **(B)**, CPI **(C)**, and immunosuppression **(D)**.

### **Figure S2. Marker genes for conserved blood and colon biopsy fine subpopulations.**

**(A)** Dot plots showing marker genes for scRNAseq immune (B, plasma, myeloid, and cycling cell) subpopulations in biopsy samples.

**(B)** Dot plots showing marker genes for scRNAseq nonimmune (epithelial, endothelial, and stromal cell) subpopulations in biopsy samples.

**(C)** Dot plots showing marker genes for scRNAseq blood subpopulations (B and myeloid cells).

### **Figure S3: Cell frequencies of select immune and non-immune subpopulations in blood and biopsies of CPI colitis patients and controls.**

Cell frequencies of scRNAseq annotated populations, stratified by disease state (mean + standard deviation; each dot represents one patient; \*  $p < 0.05$  and  $q < 0.1$ ).

**(A)** Immune fine subpopulations in biopsies (cycling, B, and plasma cells).

**(B)** Nonimmune fine subpopulations in biopsies (epithelial, endothelial, and stromal cells).

**(C)** Coarse populations in blood.

**(D)** Immune fine subpopulations in blood (T, B, and myeloid cells).

**Figure S4.** Upregulated pathways in CPI colitis. For coarse immune **(A)**, coarse non-immune **(B)**, and fine populations **(C)**, the top 10 significantly upregulated pathways in CPI colitis over healthy controls are shown, with Reactome annotation. Corresponding pathway information, including p values, combined scores, and contributing genes are in **Table S6**.

**Figure S5.** Downregulated pathways in CPI colitis. For coarse immune **(A)**, coarse non-immune **(B)**, and fine populations **(C)**, the top 10 significantly downregulated pathways in CPI colitis over healthy controls are shown, with Reactome annotation. Corresponding pathway information, including p values, combined scores, and contributing genes are in **Table S7**.

**Figure S6. DE genes in CPI colitis across individual patients.** For significantly DE genes highlighted in figures for each population, the z-score is shown as a heatmap across individual patients (columns) for immune (top) and non-immune (bottom) populations.

**Figure S7. Statistical testing of TCR data from CPI colitis and controls. (A)** Comparisons of the number of expanded clusters (node size >1), normalized to the total number of cells per sample, across disease states in biopsies (top) and blood (bottom).

**(B)** Gini coefficient for all T cells per sample in blood and biopsies across disease states. **(C)**

Descriptive statistics of the number of individual expanded TCR $\alpha\beta$  clusters shared by

combinations of CD4T RM, CD8T RM, and CD8T GZMB cells in blood and biopsies. **(D)**

Descriptive statistics of the number of individual expanded clusters shared by combinations of CD4T RM, CD8T RM, and CD8T GZMB cells in biopsies across disease states.

**Figure S8. Interferon signaling and antigen presentation across cell populations in CPI colitis.** DE genes ( $p < 0.05$  and  $\log_2(\text{FC}) > 1$  or  $< -1$ ) between healthy and CPI colitis biopsies are shown for individual coarse cell types. DE genes related to **(A)** IFN $\gamma$  signaling or **(B)** antigen presentation are labeled.

**Figure S9. Co-regulation of genes by CPI treatment, and in CPI colitis, in external data from the steroid-naive state (ref. 2).**

**(A)** Overlapping DE genes in both healthy vs CPI colitis (x axis) and CPI only vs CPI colitis (y axis) in select T cell subpopulations, with genes of interest labeled focusing on IFN signaling and antigen presentation.

**(B-C)** DE genes between HC and CPI only in coarse immune populations **(B)** and specific T cell subpopulations **(C)**.

**Table S1. Baseline demographic and clinical data for study participants.**

**Table S2. Antibody panels for CITEseq (TotalSeq-C, top), and mass cytometry (CyTOF, bottom).**

**Table S3. Marker features used to identify coarse and fine cell annotations in blood and biopsies from CPI colitis.** Lists are provided for this predominantly steroid-experienced data set, and external steroid-naïve data set (Luoma et al. Cell 2020). Features are transcripts, with the exception of CITEseq features which are specifically noted.

**Table S4. DE gene lists for coarse biopsy populations by disease in predominantly steroid-experienced disease (healthy vs CPI colitis, healthy vs UC, UC vs CPI colitis).**

**Table S5. DE gene lists for fine blood subpopulations by disease in predominantly steroid-experienced disease (healthy vs CPI colitis, healthy vs UC, UC vs CPI colitis).**

**Table S6. GSEA upregulated pathways in CPI colitis.** For individually listed coarse and fine populations, significantly upregulated pathways in CPI colitis versus healthy controls, associated Reactome annotation, p values, combined scores, and contributing genes are shown.

**Table S7. GSEA downregulated pathways in CPI colitis.** For individually listed coarse and fine populations, significantly downregulated pathways in CPI colitis versus healthy controls, associated Reactome annotation, p values, combined scores, and contributing genes are shown.

**Table S8. DE gene lists for fine biopsy subpopulations by disease in predominantly steroid-experienced disease (healthy vs CPI colitis, healthy vs UC, UC vs CPI colitis).**

**Table S9. DE gene lists for coarse biopsy populations by suppression in predominantly steroid-experienced disease (healthy vs steroid only, healthy vs anti-TNF, steroid only vs anti-TNF).**

**Table S10. DE gene lists for coarse biopsy populations by checkpoint inhibitor in predominantly steroid-experienced disease (healthy vs combo anti-PD-1+anti-CTLA-4, healthy vs anti-PD-1, anti-PD-1 vs combo).** As noted in Results, this analysis is restricted to patients who received steroids only but not anti-TNF.

**Table S11. DE gene lists for CD45-sorted biopsy populations by disease in steroid-naïve external CPI colitis data set (ref. 2; healthy vs CPI colitis, CPI only no colitis vs CPI colitis, healthy vs CPI only).**

**Table S12. DE gene lists for CD3-sorted biopsy populations by disease in steroid-naïve external CPI colitis data set (ref. 2; healthy vs CPI colitis, CPI only no colitis vs CPI colitis, healthy vs CPI only).**
