# Supplementary figures and images for: Dysregulation of CD4+ and CD8+ resident memory T, myeloid, and stromal cells in steroid-experienced, checkpoint inhibitor colitis
Source: PubMed Central journal article supplement — J Immunother Cancer. 2024 Apr 19;12(4):e008628. doi: 10.1136/jitc-2023-008628 (PMC11033653; doi:10.1136/jitc-2023-008628), 2024-04-19

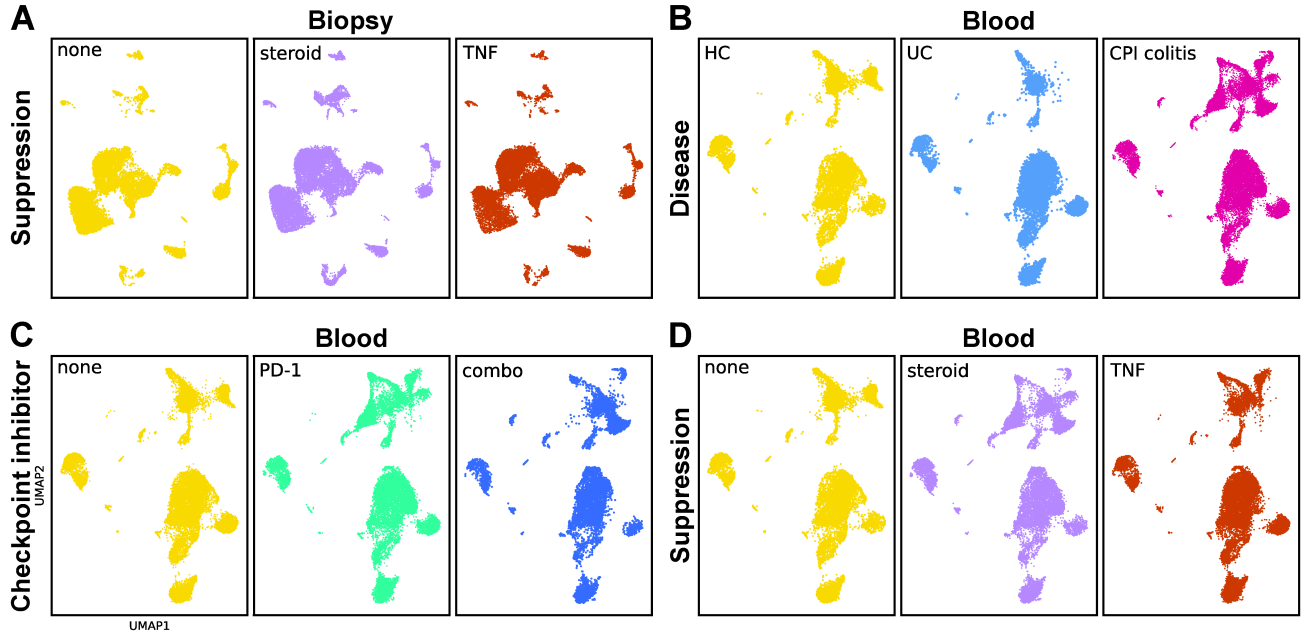

Supplement: jitc-2023-008628supp001.pdf [file jitc-2023-008628supp001.pdf]

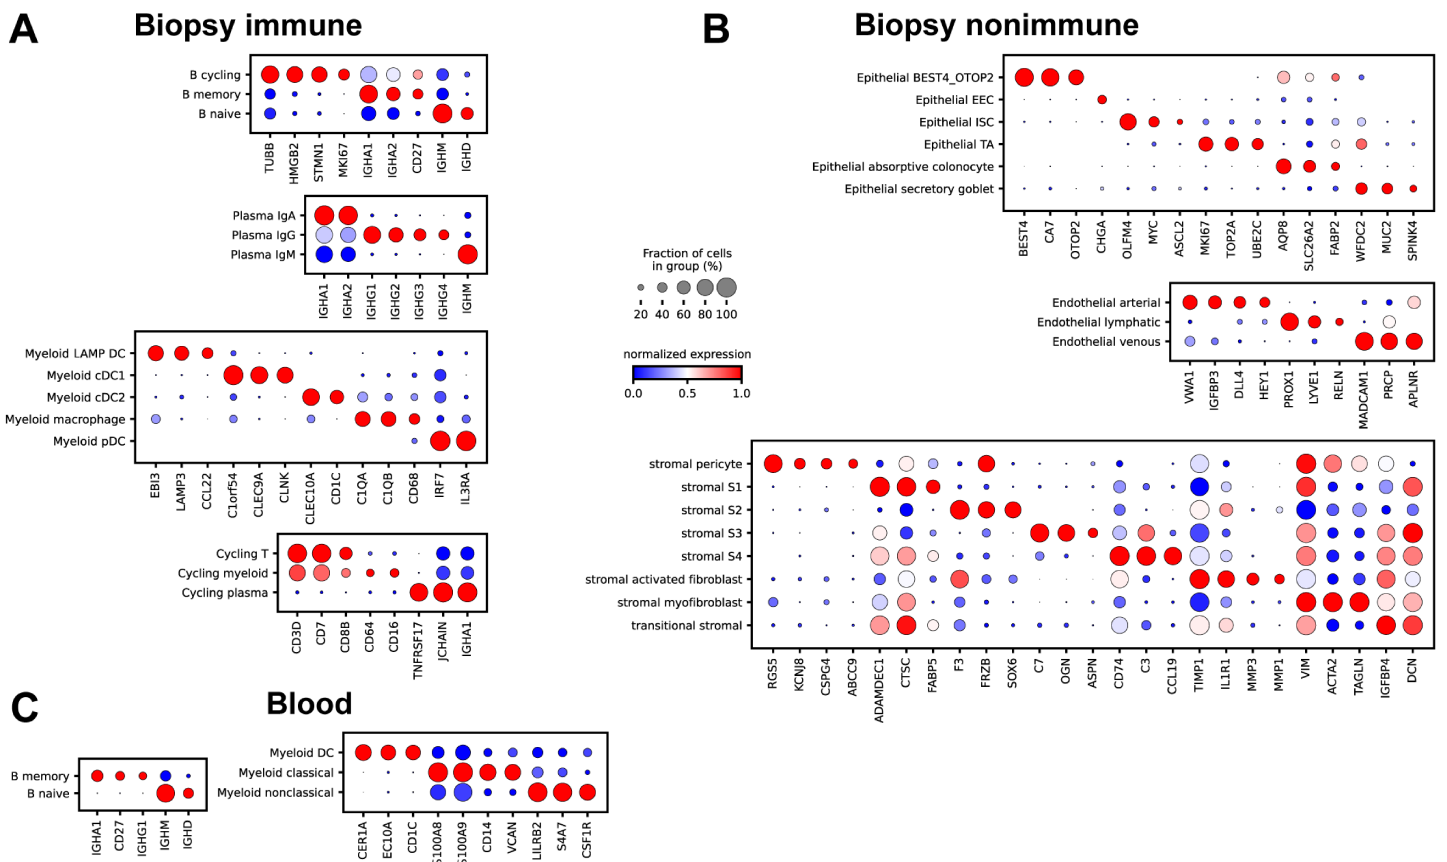

Supplement: jitc-2023-008628supp002.pdf [file jitc-2023-008628supp002.pdf]

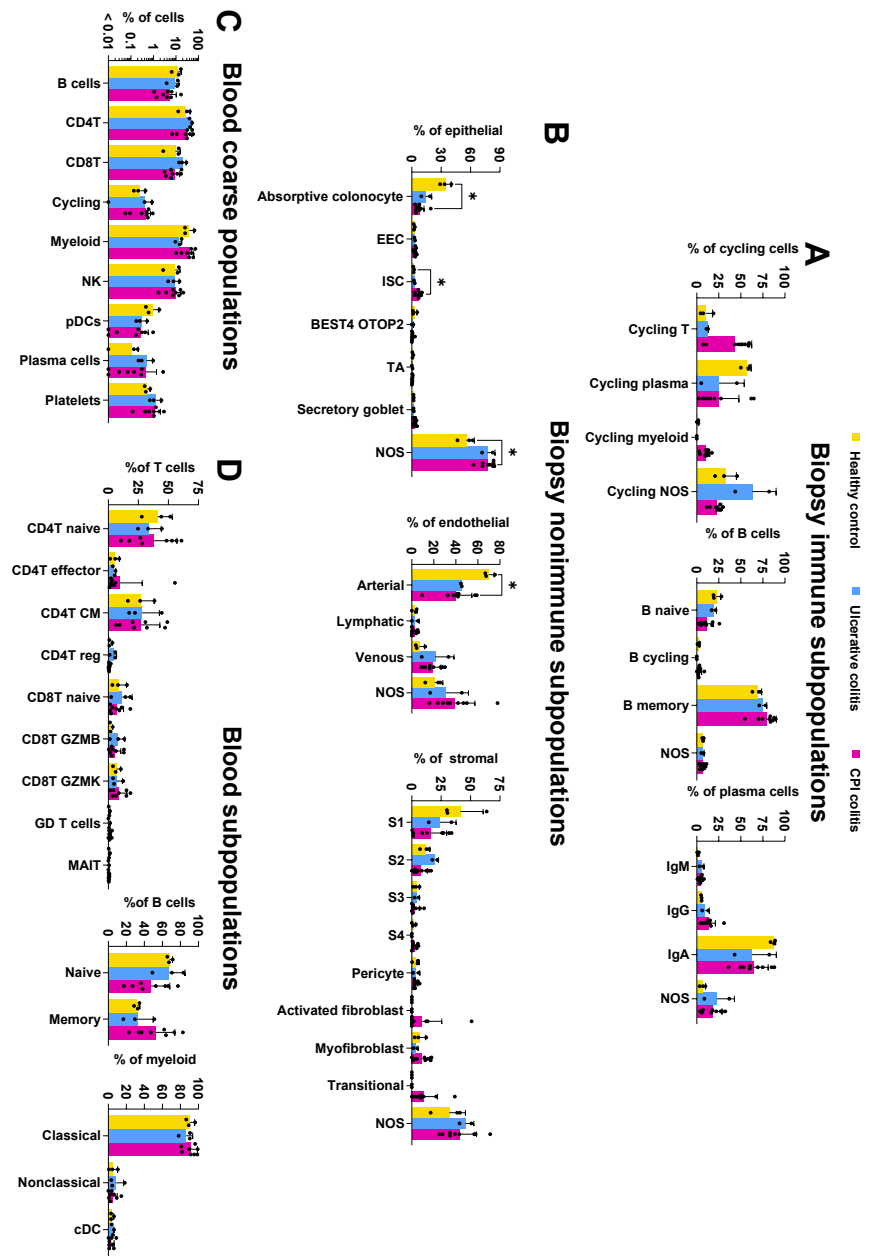

Supplement: jitc-2023-008628supp003.pdf [file jitc-2023-008628supp003.pdf]

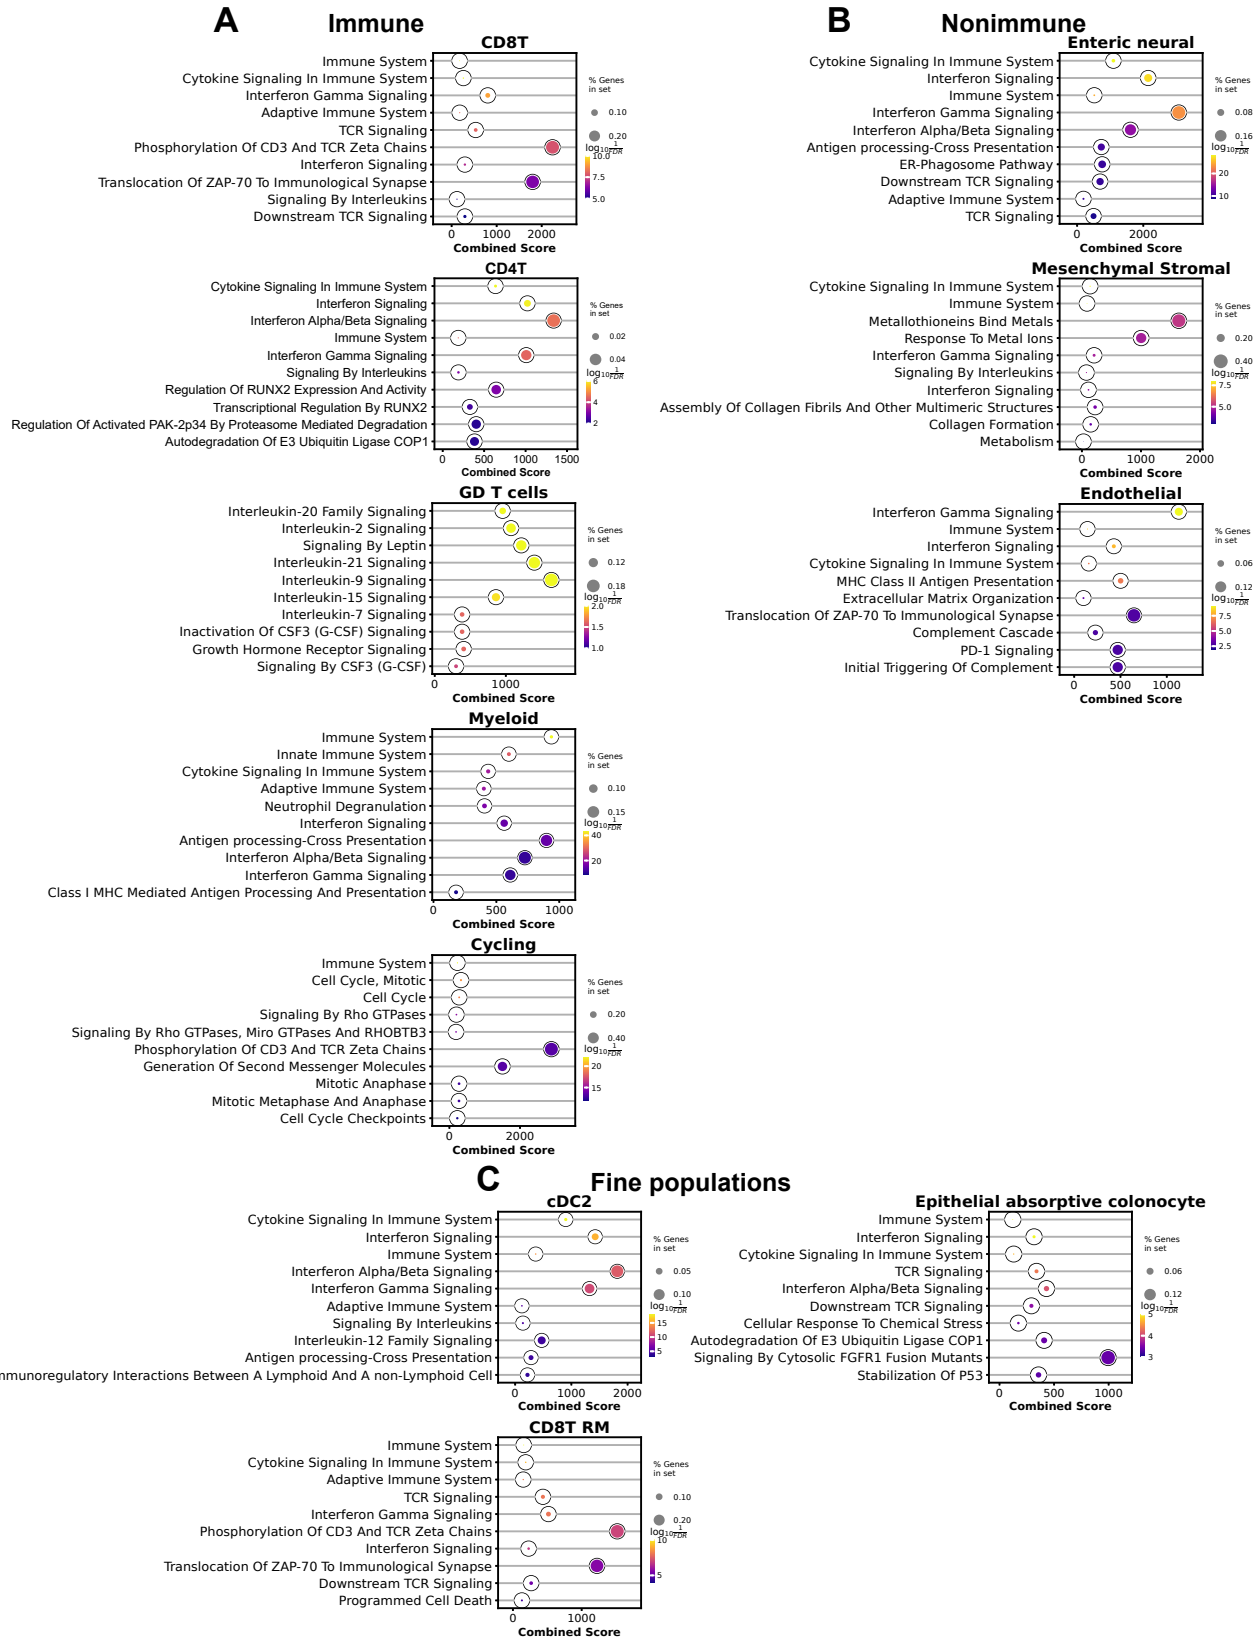

Supplement: jitc-2023-008628supp004.pdf [file jitc-2023-008628supp004.pdf]

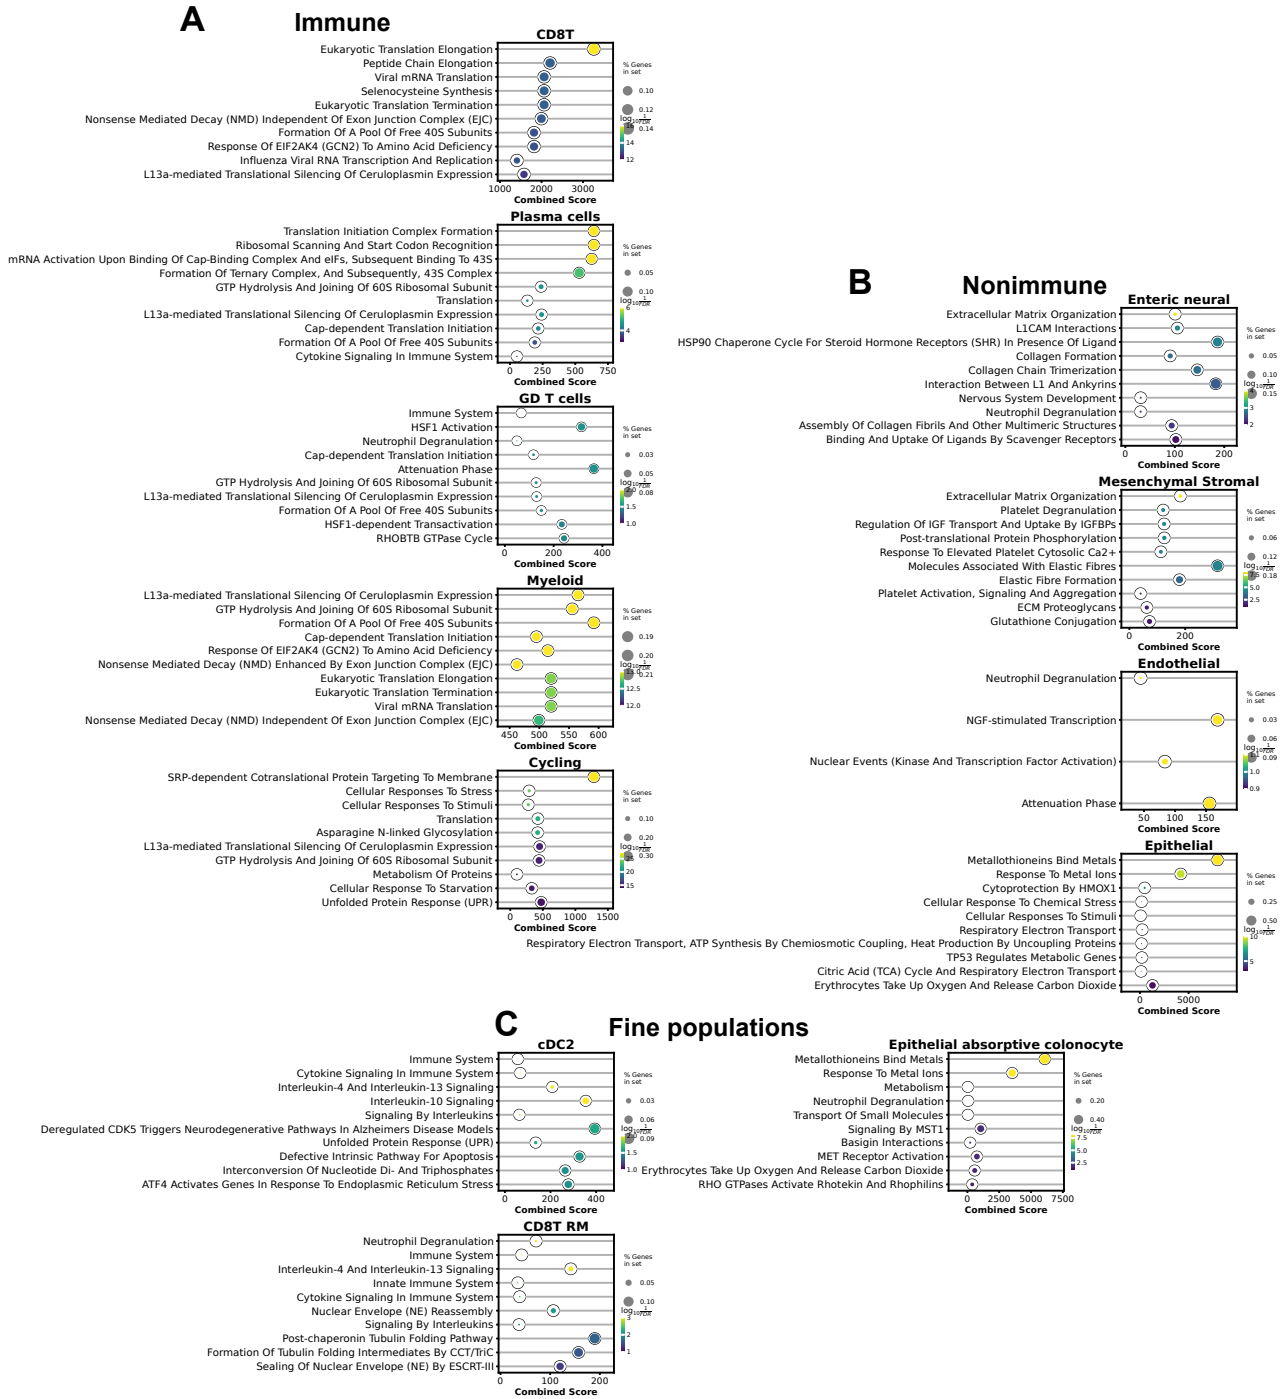

Supplement: jitc-2023-008628supp005.pdf [file jitc-2023-008628supp005.pdf]

### Immune

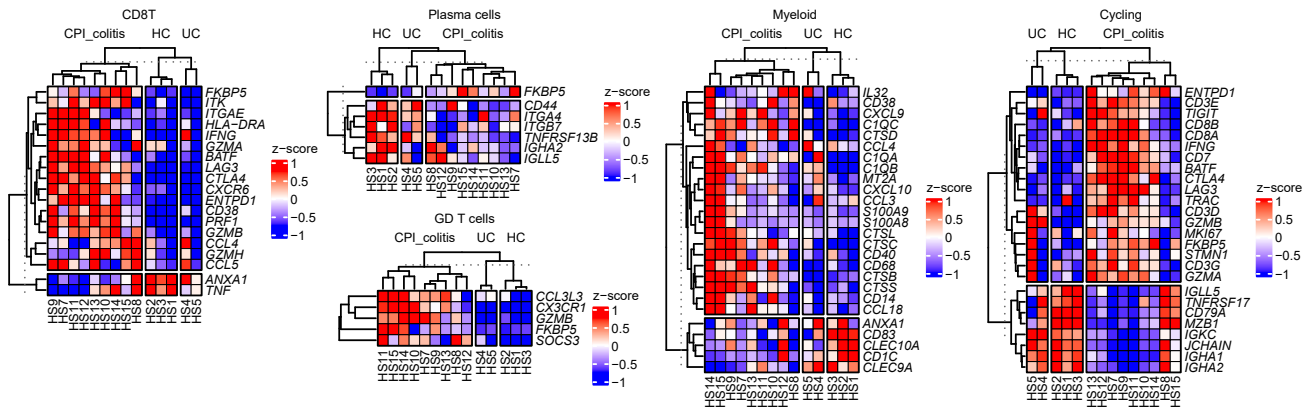

### Nonimmune

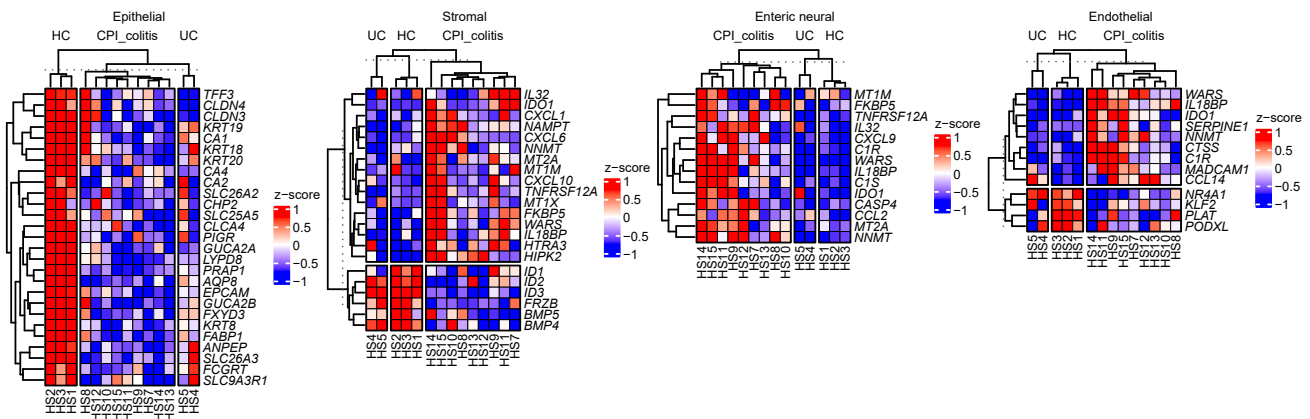

Supplement: jitc-2023-008628supp006.pdf [file jitc-2023-008628supp006.pdf]

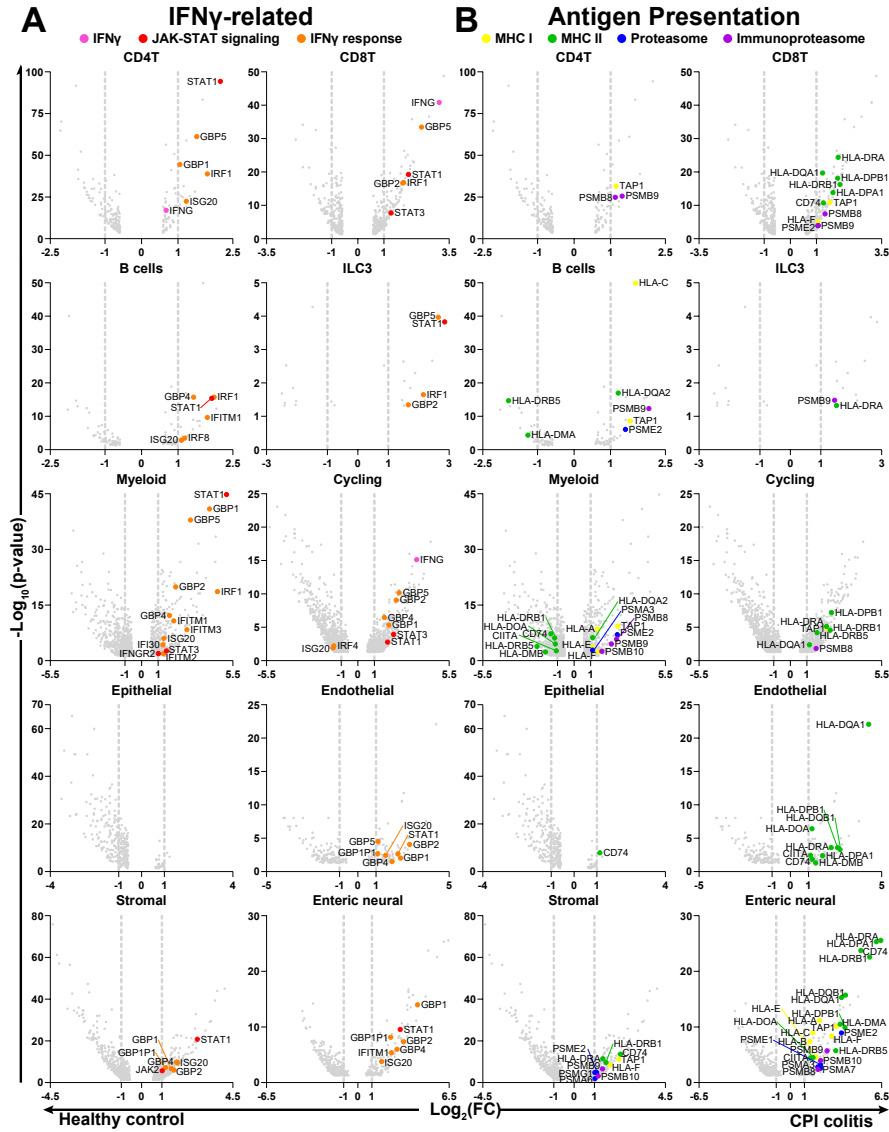

Supplement: jitc-2023-008628supp008.pdf [file jitc-2023-008628supp008.pdf]

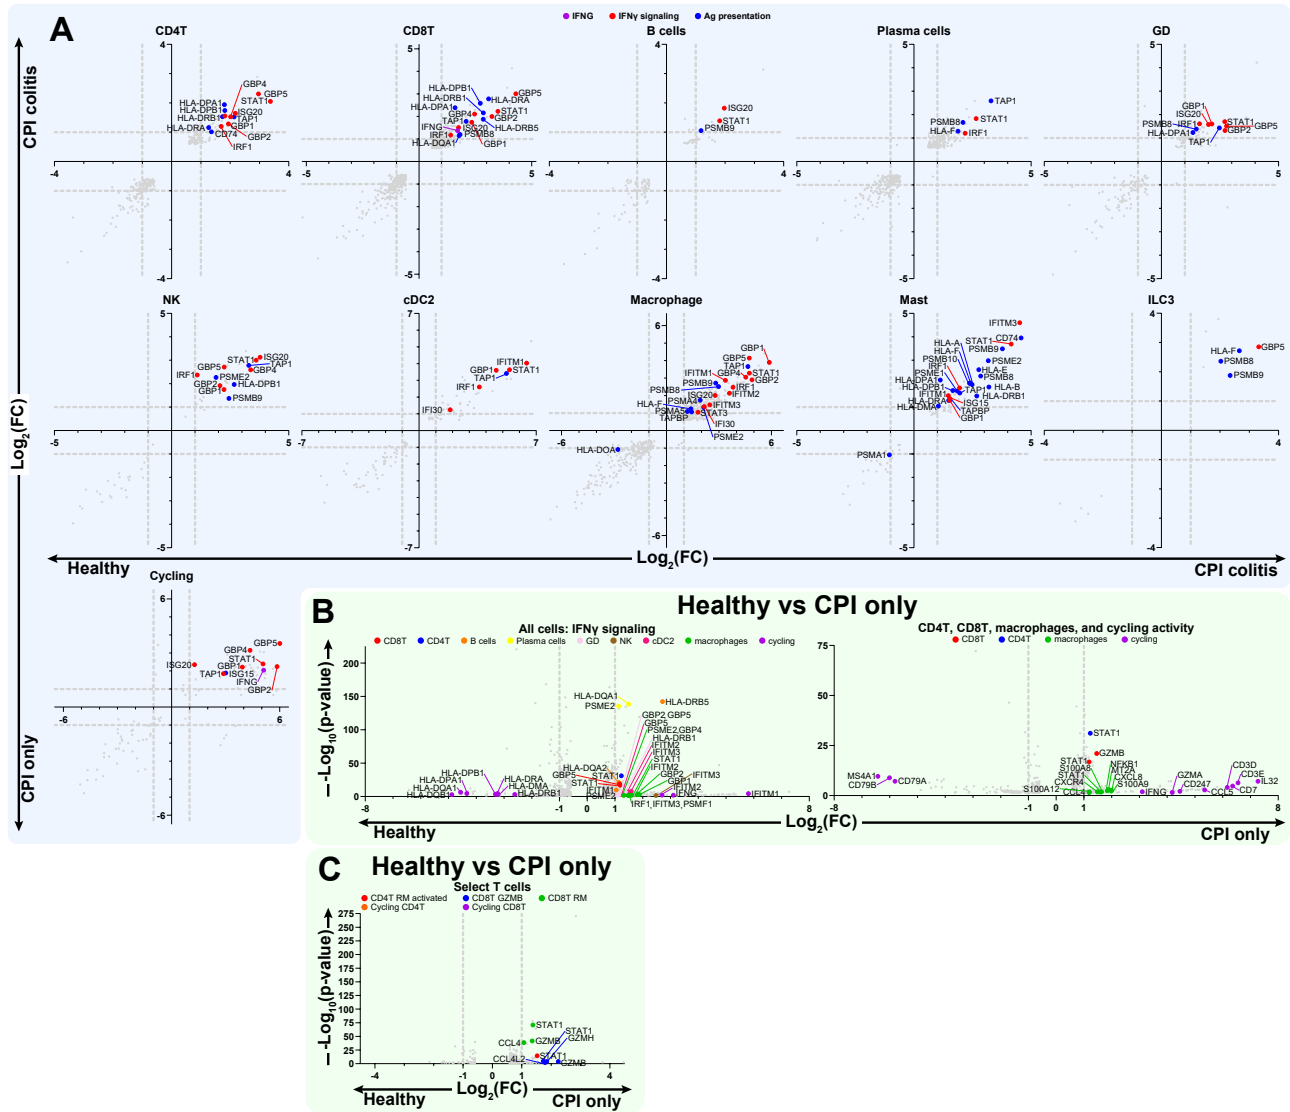

Supplement: jitc-2023-008628supp009.pdf [file jitc-2023-008628supp009.pdf]
